# Supplementary material
Source: MDPI journal article supplement (https://www.mdpi.com/2076-3417/12/8/3749)
Supplement: s1 [file s1]

## SUPPLEMENTARY DATA

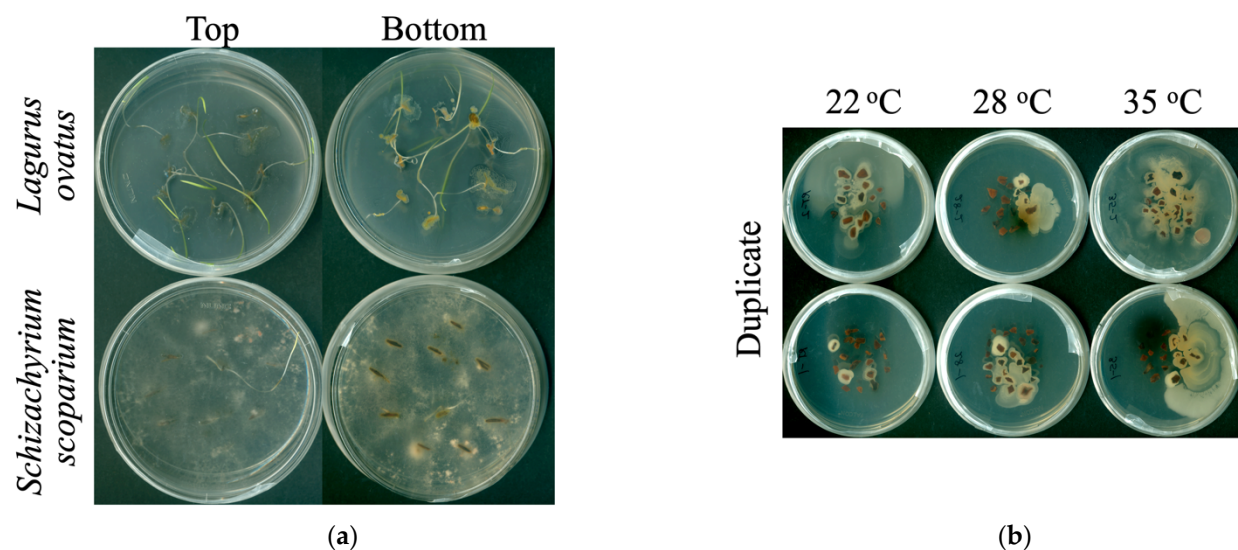

**Figure S1.** (a) Weed seed contamination with environmental fungi tested on potato dextrose agar (PDA) plates (28 °C). Fungal growth was observed during germination of tested seeds (*Lagurus ovatus* (Bunny tail grass), *Schizachyrium scoparium* (Little Bluestem)) (10 seeds / plate). Top, top view of test plates; Bottom, bottom view of test plates; (b) Walnut shell contamination with environmental fungi tested on PDA at different temperatures (22, 28 and 35 °C; Duplicate plates per each temperature) (Walnut shell particles: 0.3 g/plate).

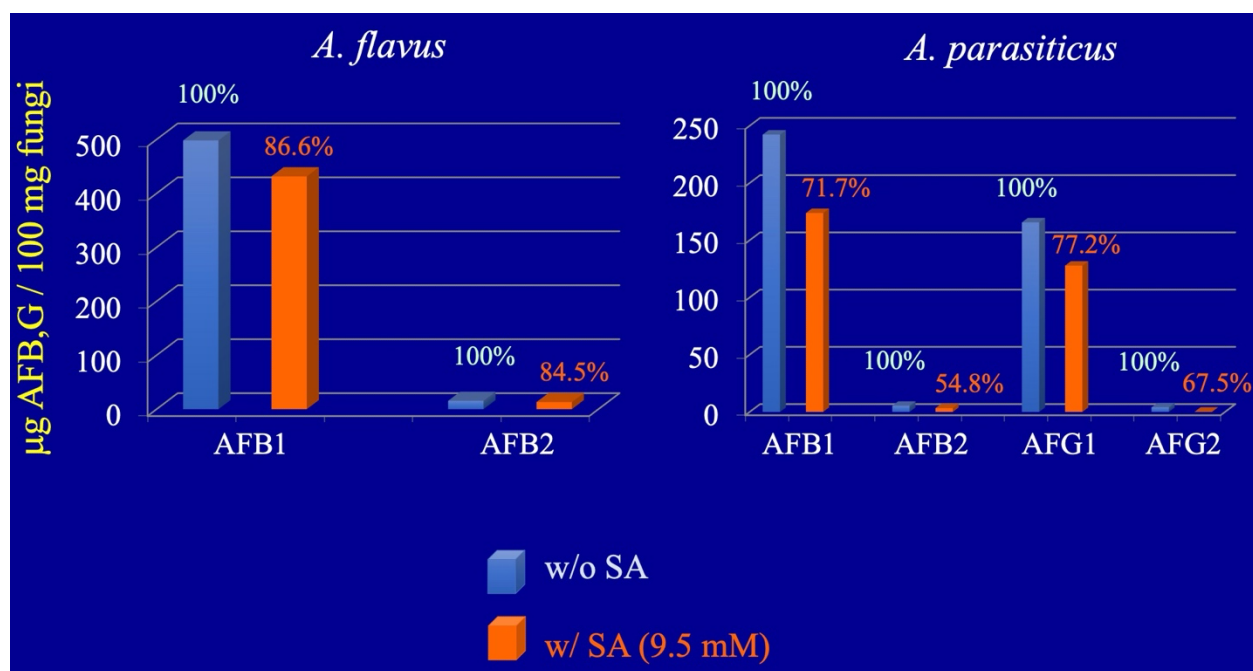

**Figure S2.** Inhibition of the production of aflatoxins (aflatoxin B (AFB) and aflatoxin G (AFG)) by *A. flavus* and *A. parasiticus* via the treatment of SA (Adapted from [12]).

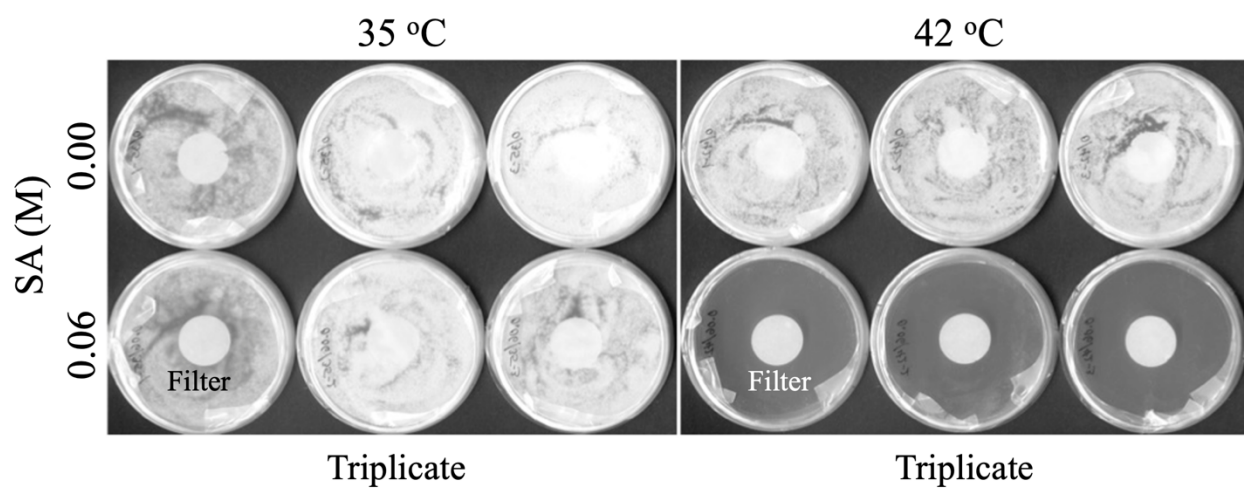

**Figure S3.** Enhanced fungicidal activity of SA at an elevated temperature (42 °C). Fungi: *A. flavus* 3357.
